# Supplementary material for: Insights into the electronic modulation of bimetallic Pt–Sn cluster for the selective hydrogenation of 1,3-butadiene
Source: Royal Society of Chemistry journal article supplement (doi:10.1039/d3cy00016h), 2023-01-01
Supplement: d3cy00016h1.pdf [file d3cy00016h1.pdf]

## Supplementary Material

# Insight into the electronic modulation of bimetallic Pt-Sn cluster for selective hydrogenation of 1,3-butadiene

Nengfeng Gong <sup>a,b,c,1</sup>, Huizi He <sup>d,1</sup>, Hongliu Wan <sup>\*,a,c</sup>, Huaming Hou <sup>c</sup>, Ziyu Zhou <sup>a,b,c</sup>, Yibo Yang <sup>a,b,c</sup>, Gaolei Qin <sup>a,b,c</sup>, Anping Yin <sup>a,b,c</sup>, Yuhang Cai <sup>a,b,c</sup>, Xiaodong Sun <sup>\*,a,c</sup>, Yongwang Li <sup>a,b,c</sup>, Zhi Cao <sup>\*,a,b,c</sup>

<sup>a</sup> State Key Laboratory of Coal Conversion, Institute of Coal Chemistry, Chinese Academy of Sciences, Taiyuan 030001, P.R. China

<sup>b</sup> University of Chinese Academy of Sciences, Beijing 100049, P.R. China

<sup>c</sup> Synfuels China Co., Ltd., Beijing 101400, P.R. China

<sup>d</sup> State Key Laboratory of Materials-Oriented Chemical Engineering, College of Chemical Engineering, Nanjing Tech University, Nanjing 210009, P.R. China

\* Corresponding author

E-mail: wanhongliu@synfuelschina.com.cn (Hongliu Wan),

sunxiaodong@synfuelschina.com.cn (Xiaodong Sun), and caozhi@sxicc.ac.cn (Zhi Cao).

<sup>1</sup> These authors contributed equally.

**Table S1.** Elemental composition of PtSn catalysts determined by ICP-OES.

| Catalysts  | Pt wt. % | Sn wt. % | K wt. % | Sn/Pt        | CO uptake  |
|------------|----------|----------|---------|--------------|------------|
|            |          |          |         | atomic ratio | (mol/gcat) |
| PtSn1/S-1  | 0.36     | 0.22     | 0.44    | 1.00         | 5.57       |
| PtSn3/S-1  | 0.35     | 0.64     | 0.43    | 3.01         | 5.11       |
| PtSn10/S-1 | 0.34     | 2.07     | 0.41    | 10.01        | 2.40       |

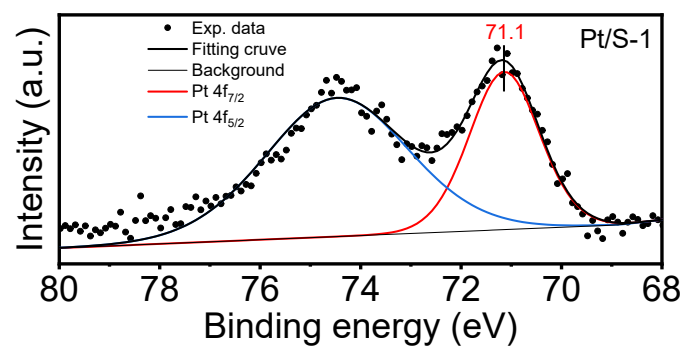

**Fig. S1.** Pt 4f spectra of reduced Pt/S-1 samples. The sample were reduced by H<sub>2</sub> at 600°C for 1 h prior to XPS measurement.

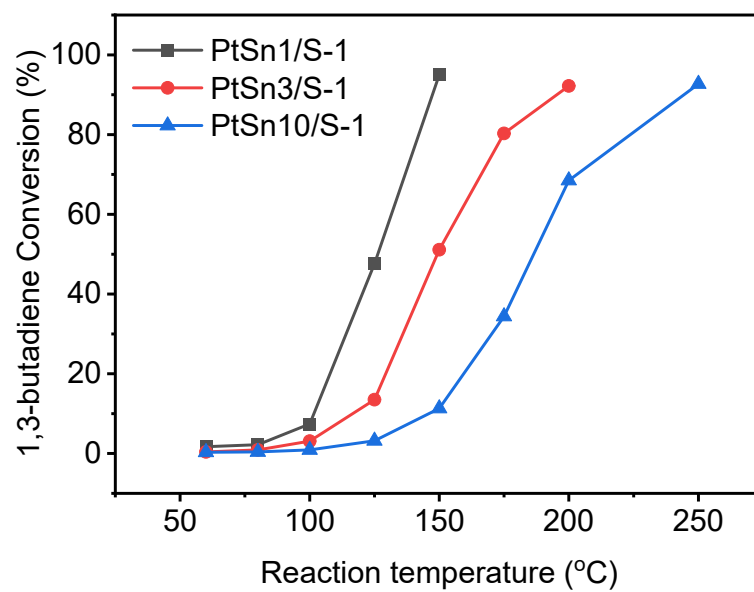

**Fig. S2** The 1,3-butadiene conversion as a function of reaction temperature over different samples.

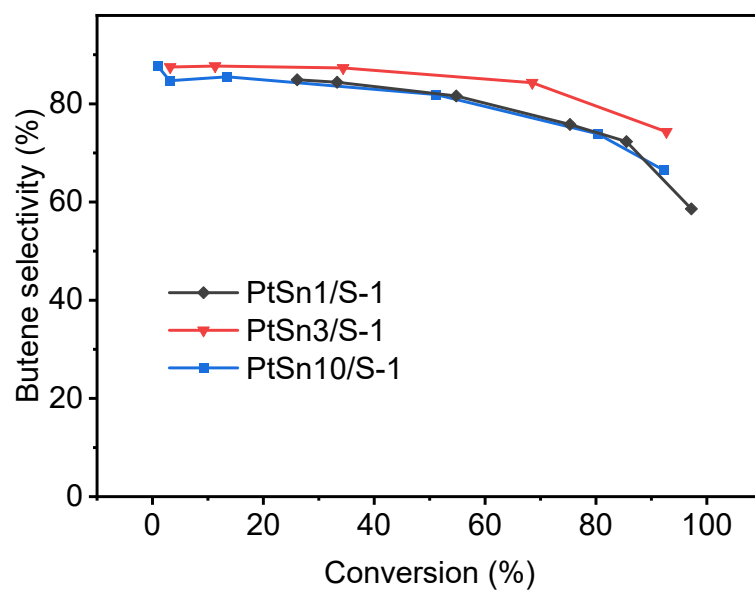

**Fig. S3** The butene selectivity as a function of 1,3-butadiene conversion over PtSn/S-1 samples.

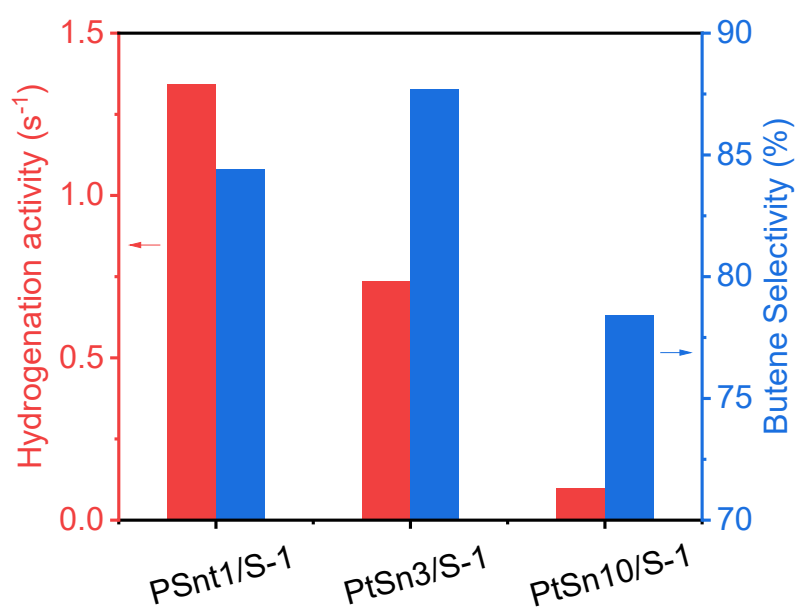

**Fig. S4.** Initial specific activity and butene selectivity of the PtSn/S-1 samples during hydrogenation of 1,3-butadiene in the absence of CO. All the samples were reduced by  $\text{H}_2$  at 600 °C for 3h prior to catalytic evaluation. Reaction condition: 10 mg samples, 125 °C, 4 ml/min  $\text{H}_2$ , 20 ml/min 2%1,3-butadiene/ $\text{N}_2$ .

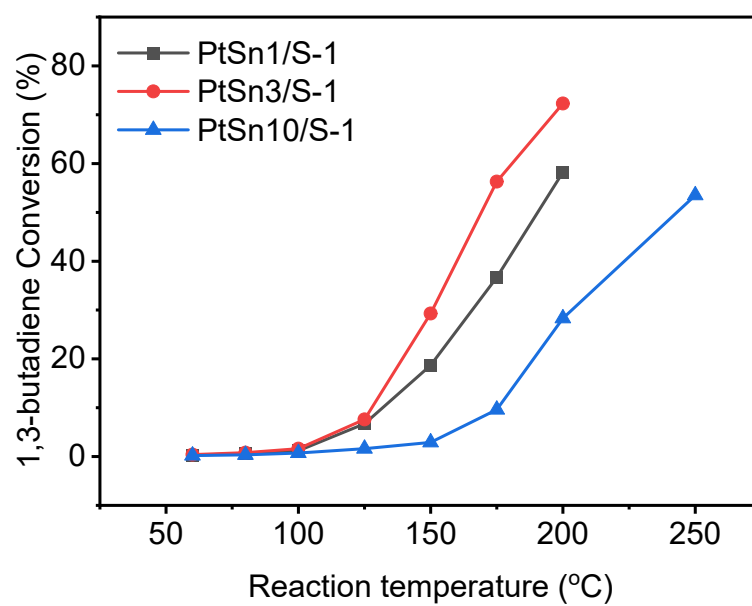

**Fig. S5** The 1,3-butadiene conversion as a function of reaction temperature over different samples in the presence of CO.

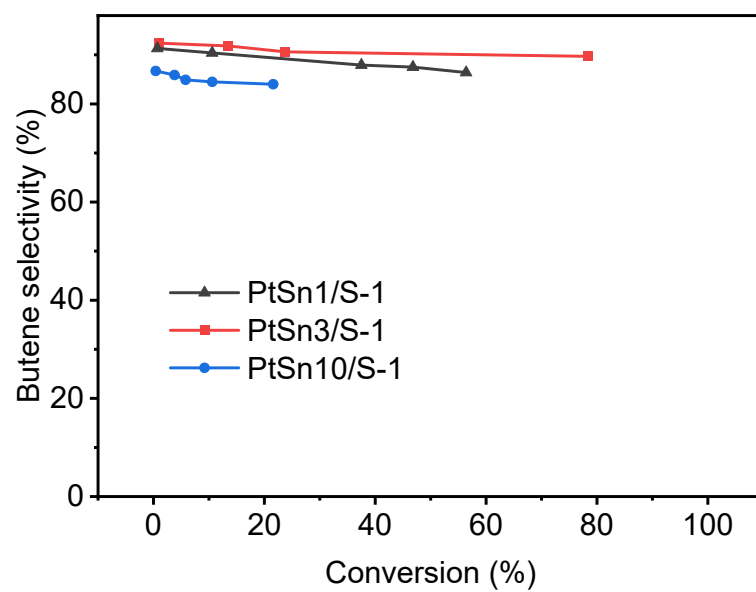

**Fig. S6** The butene selectivity as a function of reaction temperature over different samples in the presence of CO.

**Table S2.** Catalytic performance for different PtSn catalysts in the 1,3-butadiene hydrogenation at 125°C. Data were acquired under the kinetic region with conversion <40% by tuning the space velocity.

| Catalysts  | TOF                             | TOF                             | Selectivity (%) |                      |                        |        | Butene   |
|------------|---------------------------------|---------------------------------|-----------------|----------------------|------------------------|--------|----------|
|            | (s <sup>-1</sup> ) <sup>a</sup> | (s <sup>-1</sup> ) <sup>b</sup> | 1-butene        | <i>cis</i> -2-butene | <i>trans</i> -2-butene | butane | sel. (%) |
| PtSn1/S-1  | 1.34                            | 4.45                            | 55.6            | 11.9                 | 16.9                   | 15.6   | 84.4     |
| PtSn3/S-1  | 0.74                            | 2.58                            | 58.0            | 11.8                 | 17.9                   | 12.3   | 87.7     |
| PtSn10/S-1 | 0.10                            | 0.71                            | 49.8            | 11.7                 | 16.9                   | 21.6   | 78.4     |

<sup>a</sup> TOF is determined by the overall content of Pt in the catalysts.

<sup>b</sup> TOF is determined by CO uptake.

**Table S3.** Catalytic performance for different PtSn catalysts among the 1,3-butadiene hydrogenation at 125°C in the presence of CO. Data was acquired under the kinetic region with conversion <40% by tuning the space velocity.

| Catalysts  | TOF<br>(h <sup>-1</sup> ) <sup>a</sup> | Selectivity (%) |                      |                        |        | Butene sel. (%) |
|------------|----------------------------------------|-----------------|----------------------|------------------------|--------|-----------------|
|            |                                        | 1-butene        | <i>cis</i> -2-butene | <i>trans</i> -2-butene | butane |                 |
| PtSn1/S-1  | 0.36                                   | 56.0            | 12.4                 | 19.5                   | 12.1   | 87.9            |
| PtSn3/S-1  | 0.41                                   | 54.3            | 14.9                 | 23.2                   | 7.6    | 92.4            |
| PtSn10/S-1 | 0.08                                   | 54.1            | 12.5                 | 18.8                   | 14.5   | 85.5            |

<sup>a</sup> TOF is determined by the overall content of Pt in the catalysts.

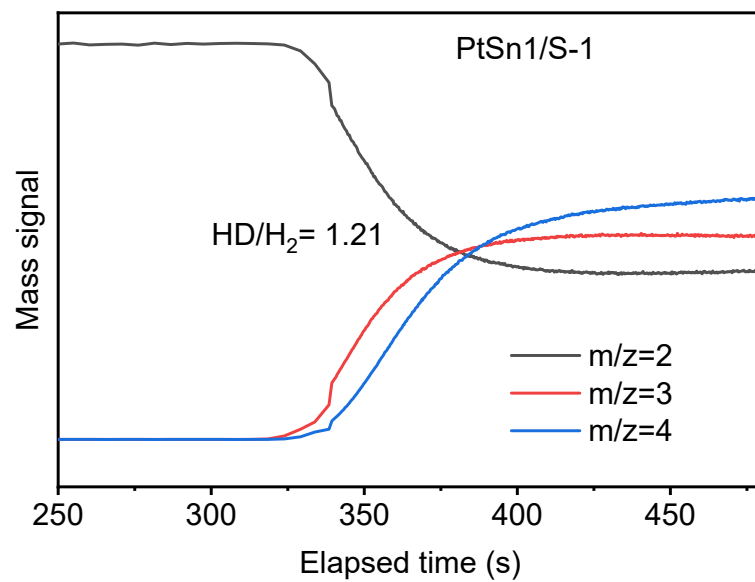

**Fig. S7** H<sub>2</sub>-D<sub>2</sub> exchange profile of PtSn1/S-1 samples after reduction in H<sub>2</sub> at 600 °C for 3 h.

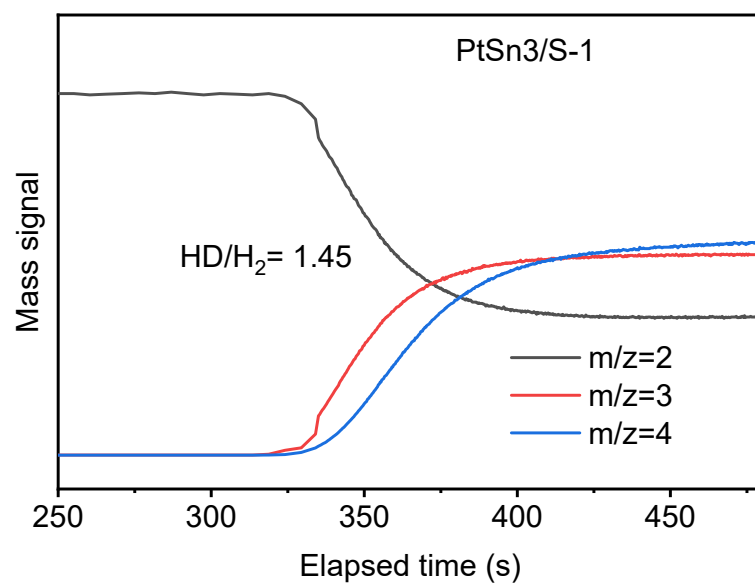

**Fig. S8** H<sub>2</sub>-D<sub>2</sub> exchange profile of PtSn<sub>3</sub>/S-1 samples after reduction in H<sub>2</sub> at 600 °C for 3 h.

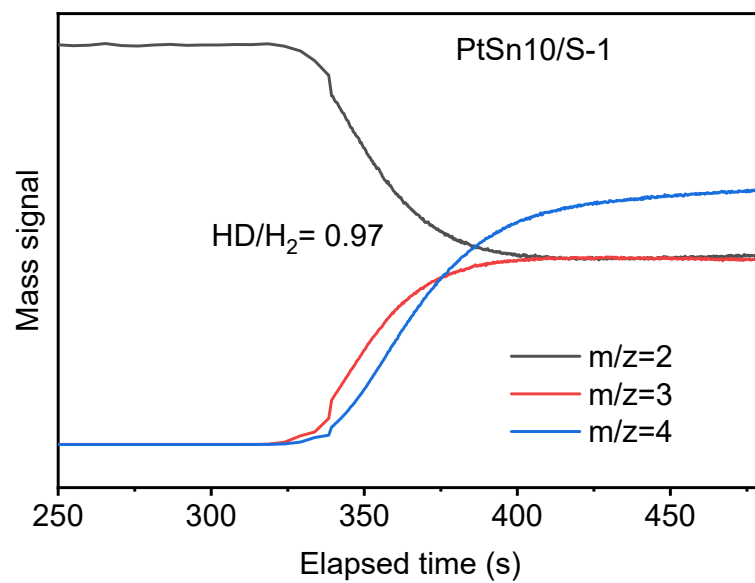

**Fig. S9** H<sub>2</sub>-D<sub>2</sub> exchange profile of PtSn10/S-1 samples after reduction in H<sub>2</sub> at 600 °C for 3 h.

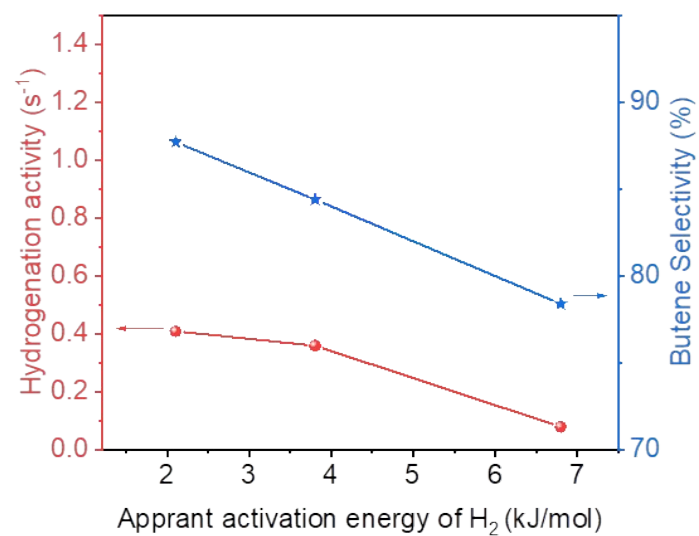

**Fig. S10.** Proposed correlation between the energy barrier of H<sub>2</sub> dissociation and intrinsic hydrogenation of activity and butene selectivity.
